# Supplementary material for: Seventeen New Complete mtDNA Sequences Reveal Extensive Mitochondrial Genome Evolution within the Demospongiae
Source: PLoS One. 2008 Jul 16;3(7):e2723. doi: 10.1371/journal.pone.0002723 (PMC2444032; doi:10.1371/journal.pone.0002723)
Supplement: Table S1 — (0.04 MB XLS) [file pone.0002723.s004.xls]

## Sheet: Sheet1
					Table S1. Comparison of mitochondrial protein genes in demosponges: number of encoded amino acids.
Protein-coding genes	Oscarella carmela	Geodia neptuni	Tethya actinia	Cinachyrella kuekanthali	Chondrilla nucula	Agelas schmidti	Topsentia ophiraphidites	Ptilocaulis walpersi	Axinella corrugata	Callyspongia plicifera	Iotrochota birotulata	Amphimedon compressa	Aplysina fistularis	Ectyoplasia ferox	Ephydatia muelleri	Xestospongia muta	Amphimedon queenslandica	Halisarca dujardini	Vaceletia sp.	Hippospongia lachnea	Igernella notabillis	Plakortis angullospi-culatus
atp6	245	244	244	241	244	244	244	244	244	244	244	241	244	244	244	244	234	244	235	235	242	247
atp8	66	63	80	63	77	90	67	66	90	82	72	71	77	66	84	76	73	74	90	71	67	66
atp9	76	78	78	78	78	78	78	78	78	78	78	78	78	78	78	78	-	78	77	77	78	75
cob	400	381	381	381	381	381	381	381	381	382	385	382	381	381	381	382	405	381	391	381	381	391
cox1	521	520	522	522	520	522	520	519	525	536	526	525	528	519	526	522	530	520	530	534	515	523
cox2	249	247	243	245	253	266	264	252	234	244	238	239	244	249	258	246	251	256	231	253	238	252
cox3	261	262	262	262	261	261	262	262	262	262	262	262	262	262	262	262	259	261	260	260	261	261
nad1	328	327	338	327	324	328	327	325	333	318	323	319	321	324	328	314	314	324	301	301	325	325
nad2	465	465	481	455	474	479	465	470	525	452	458	450	475	468	476	458	454	475	436	436	465	475
nad3	118	118	118	119	119	118	118	118	118	118	122	118	117	118	118	118	118	119	116	116	118	122
nad4	495	481	482	486	485	490	481	481	484	480	479	484	475	481	483	484	483	489	467	469	478	491
nad4L	99	106	99	100	99	99	100	99	99	99	100	99	99	99	99	99	98	99	98	98	96	106
nad5	633	603	622	603	608	620	625	617	661	620	615	624	618	614	615	622	606	608	653	623	602	619
nad6	197	185	187	179	191	189	188	185	183	183	183	184	190	185	196	187	197	196	161	169	175	197
tatC	253	-	-	-	-	-	-	-	-	-	-	-	-	-	-	-	-	-	-	-	-	-
